# Supplementary material for: Synthesis of a nano molecularly imprinted polymeric sorbent for solid phase extraction and determination of phenytoin in plasma, urine, and wastewater by HPLC
Source: Royal Society of Chemistry journal article supplement (doi:10.1039/c6ra00421k), 2016-01-01
Supplement: c6ra00421k1.pdf [file c6ra00421k1.pdf]

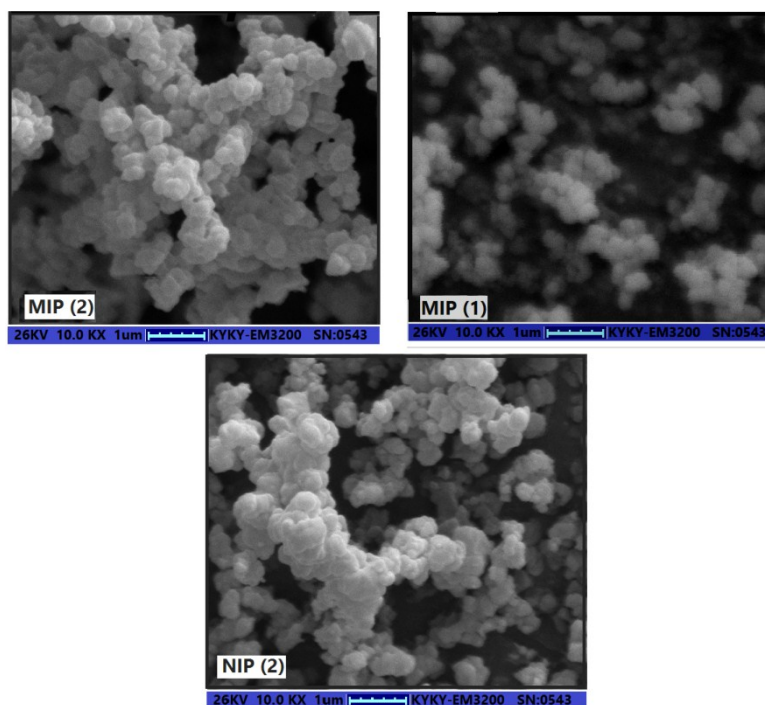

**Fig. S1** Scanning electron micrograph images of washed MIP1, NIP1, and MIP2.

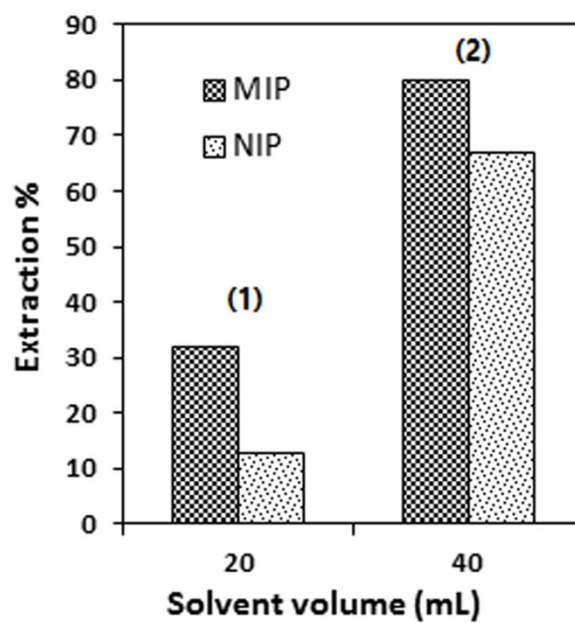

**Fig. S2** Extraction percentage of phenytoin from aqueous solution (20 mL, 10 µg mL<sup>-1</sup>, 30 min) by synthesized MIP/NIPs (20 mg) in (1) 20 mL and (2) 40 mL of porogen.

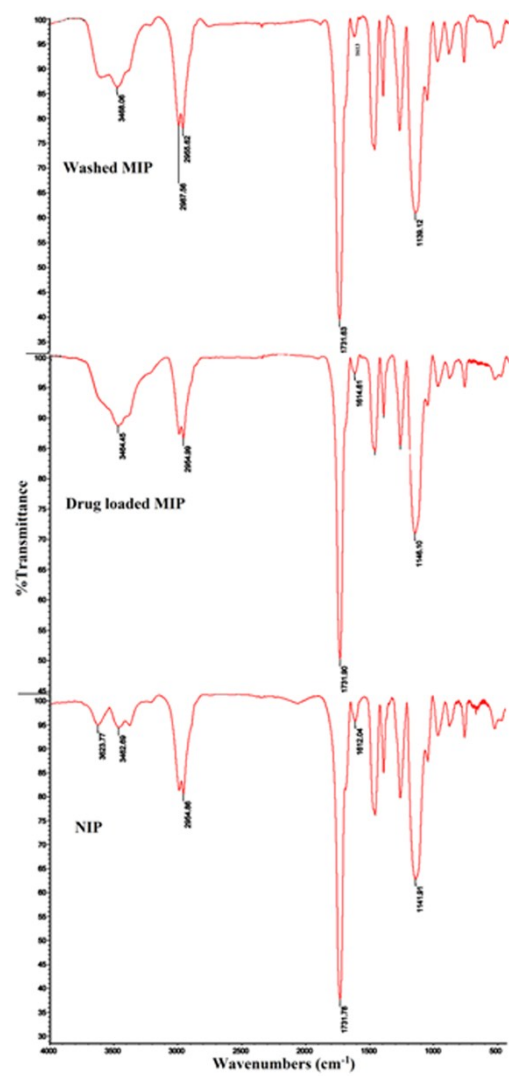

**Fig. S3** FTIR spectra of NIP, washed MIP and MIP after absorbing of the phenytoin.

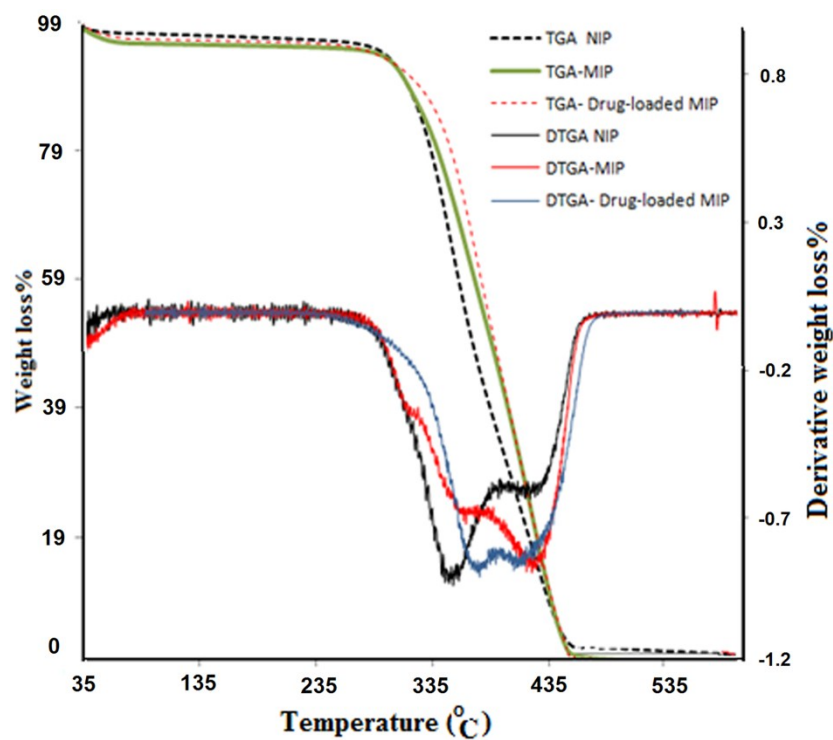

Fig. S4 TGA and DTGA diagrams of washed MIP, NIP, and MIP after absorbing of the phenytoin.

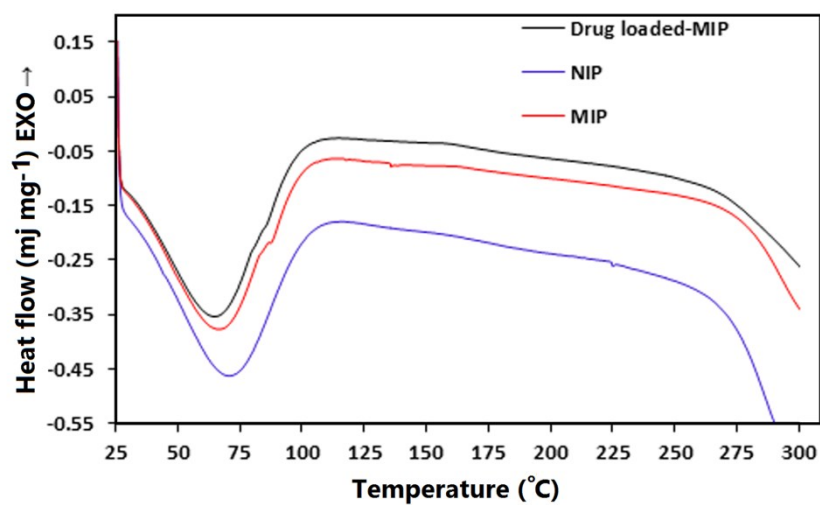

Fig. S5 DSC thermogram of washed MIP, NIP, and MIP after absorbing of the phenytoin.

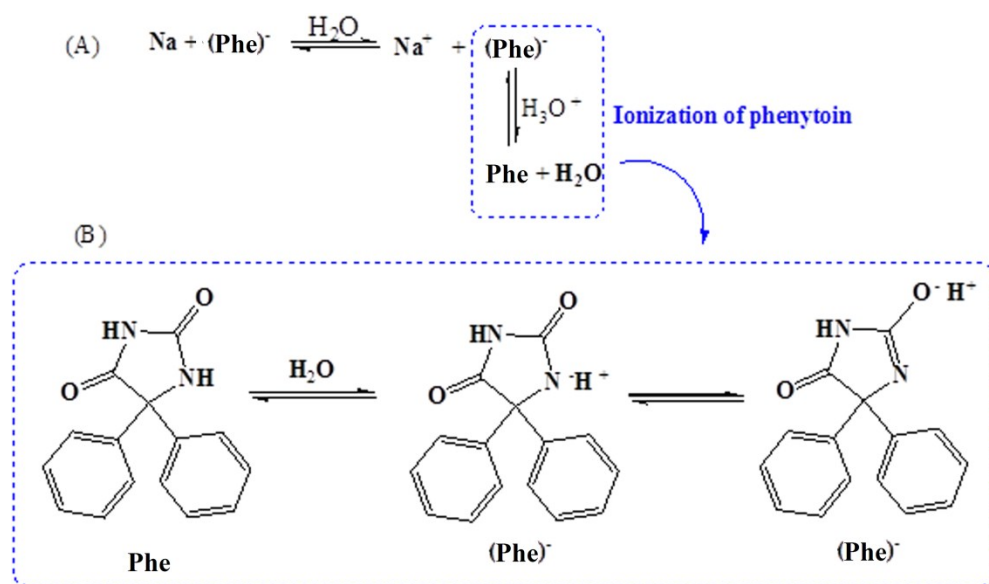

**Scheme S1** (A) Equilibrium between sodium salt and base state of phenytoin and (B) ionization of phenytoin base in water.<sup>63</sup>
